# Supplementary material for: Superconductivity in Ca-intercalated bilayer graphene: C2CaC2
Source: Royal Society of Chemistry journal article supplement (doi:10.1039/d3cp06245g), 2024-01-01
Supplement: d3cp06245g1.pdf [file d3cp06245g1.pdf]

# Supplementary Materials for Superconductivity in Ca-intercalated bilayer graphene: $C_2CaC_2$

Jin-Han Tan<sup>1</sup>, Hao Wang<sup>1</sup>, Ying-Jie Chen<sup>1</sup>, Na Jiao<sup>1</sup>,  
Meng-Meng Zheng<sup>1\*</sup>, Hong-Yan Lu<sup>1\*</sup> and Ping Zhang<sup>1,2\*</sup>

<sup>1</sup>School of Physics and Physical Engineering, Qufu Normal University, Qufu 273165,  
China

<sup>2</sup> Institute of Applied Physics and Computational Mathematics, Beijing 100088, China.

Corresponding Authors

\*E-mail:(M. M. Z.) qfzhmm@163.com

\*E-mail:(H. Y. L.) hylu@qfnu.edu.cn

\*E-mail:(P. Z.) zhang\_ping@iapcm.ac.cn

## I. Computational details.

The total EPC constant  $\lambda$  is obtained via isotropic Eliashberg function <sup>[1-3]</sup>:

$$\alpha^2 F(\omega) = \frac{1}{2\pi N(E_F)} \sum_{\mathbf{q}\nu} \delta(\omega - \omega_{\mathbf{q}\nu}) \frac{\gamma_{\mathbf{q}\nu}}{\omega_{\mathbf{q}\nu}}, \quad (1)$$

$$\lambda = 2 \int_0^\infty \frac{\alpha^2 F(\omega)}{\omega} d\omega = \sum_{\mathbf{q}\nu} \lambda_{\mathbf{q}\nu}, \quad (2)$$

where  $\alpha^2 F(\omega)$  is Eliashberg function and  $N(E_F)$  is the DOS at the Fermi level,  $\omega_{\mathbf{q}\nu}$  is the phonon frequency of the  $\nu$ th phonon mode with wave vector  $\mathbf{q}$ , and  $\gamma_{\mathbf{q}\nu}$  is the phonon linewidth <sup>[1-3]</sup>. The  $\gamma_{\mathbf{q}\nu}$  can be estimated by:

$$\gamma_{\mathbf{q}\nu} = \frac{2\pi\omega_{\mathbf{q}\nu}}{\Omega_{\text{BZ}}} \sum_{k,n,m} |g_{kn,k+\mathbf{q}m}^\nu|^2 \delta(\varepsilon_{kn} - E_F) \delta(\varepsilon_{k+\mathbf{q}m} - E_F), \quad (3)$$

where  $\Omega_{\text{BZ}}$  is the volume of the Brillouin zone (BZ),  $\varepsilon_{kn}$  and  $\varepsilon_{k+\mathbf{q}m}$  indicate the Kohn-Sham energy, and  $g_{kn,k+\mathbf{q}m}^\nu$  represents the screened electron-phonon matrix element.  $\lambda_{\mathbf{q}\nu}$  is the EPC constant for phonon mode  $\mathbf{q}\nu$ , which is defined as:

$$\lambda_{\mathbf{q}\nu} = \frac{\gamma_{\mathbf{q}\nu}}{\pi \hbar N(E_F) \omega_{\mathbf{q}\nu}^2}. \quad (4)$$

$T_c$  is estimated by the Allen-Dynes modified McMillan equation <sup>[3]</sup>:

$$T_c = \frac{\omega_{\log}}{1.2} \exp\left[\frac{-1.04(1 + \lambda)}{\lambda - \mu^* (1 + 0.62\lambda)}\right]. \quad (5)$$

The hysteretic Coulomb pseudopotential  $\mu^*$  in Eq. (5) is set to 0.1 and logarithmic average of the phonon frequencies  $\omega_{\log}$  is defined as:

$$\omega_{\log} = \exp\left[\frac{2}{\lambda} \int_0^\omega \alpha^2 F(\omega) \frac{\log \omega}{\omega} d\omega\right]. \quad (6)$$

## II. The crystal structure of Ca-intercalated AB-stacking bilayer

### graphene $C_2CaC_2$ .

The lattice structure of calcium intercalated AB-stacking bilayer graphene  $C_2CaC_2$  is shown in Fig. S1. After full optimization, the lattice parameter is 2.59 Å, which is slightly smaller than that of the AA-stacking  $C_2CaC_2$ . The height between the two graphene layers is 5.294 Å, slightly larger than that of the AA-stacking  $C_2CaC_2$ . When calculating its stability, we find that its phonon dispersion has no imaginary frequencies, as shown in Fig. S2, indicating dynamic stability. However, during the subsequent verification of thermodynamic stability, it gradually changed to AA-stacking with lower system energy, as shown in Fig. S3.

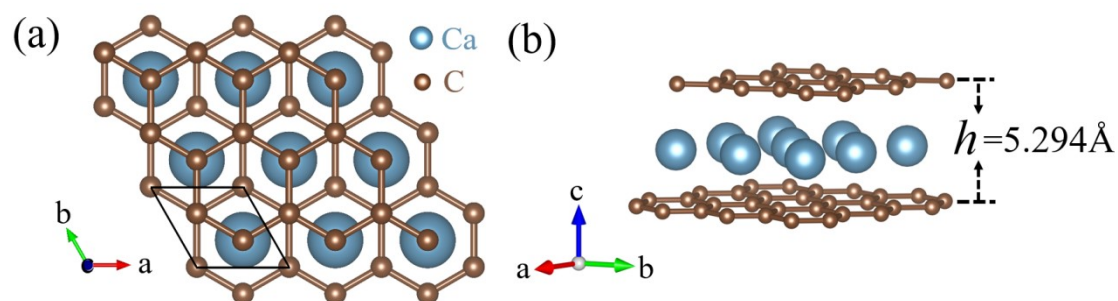

FIG. S1 (a) Top (a) and side (b) views of Ca-intercalated AB-stacking bilayer graphene  $C_2CaC_2$ . The unit cell is shown by the black solid line. Carbon, calcium atoms are represented by brown and blue spheres, respectively.

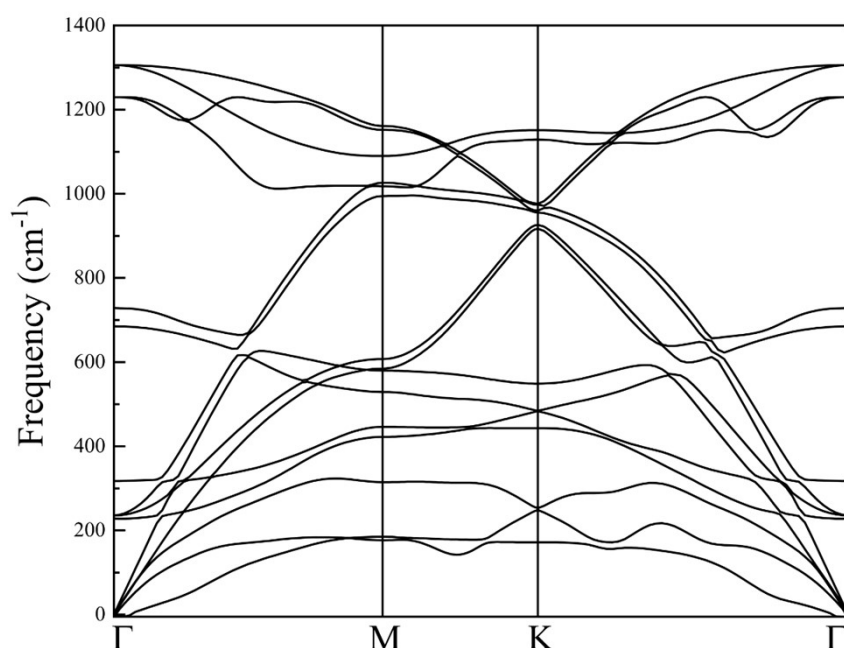

FIG. S2 Phonon dispersion for the AB-stacking  $C_2CaC_2$ .

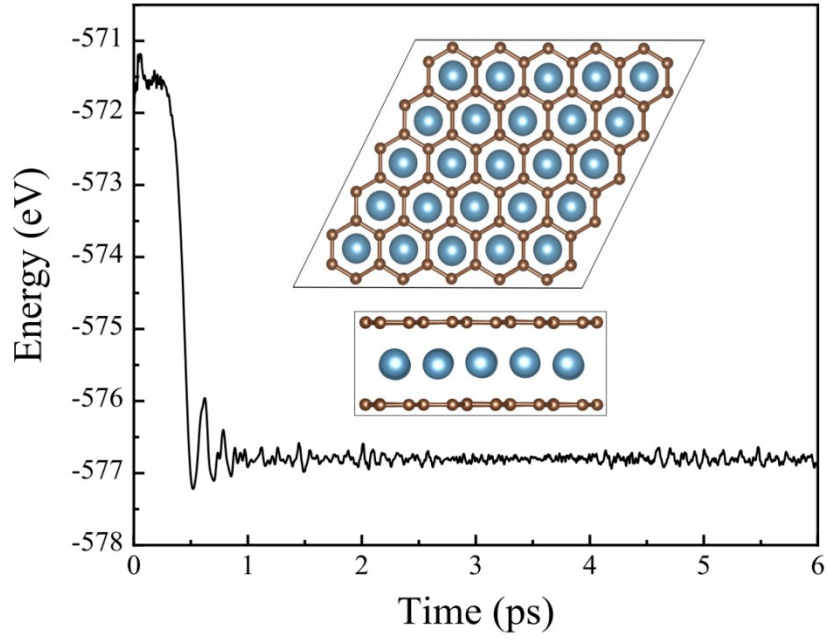

FIG. S3 The variation of the free energy in the AIMD simulations in the time scale of 6 ps along with the last frame of photographs at 50 K for the AB-stacking  $C_2CaC_2$ .

### III. The calculated phonon dispersion of $C_2CaC_2$ in the case of biaxial strain with $\varepsilon = -7\%$ , $11\%$ .

In the case of different strained cases applied to the structure, we find that with  $\varepsilon = -7\%$  and  $11\%$  of  $C_2CaC_2$ , the structure begins to show dynamic instability. As is shown in Fig. S4, the phonon dispersion exhibits imaginary frequencies.

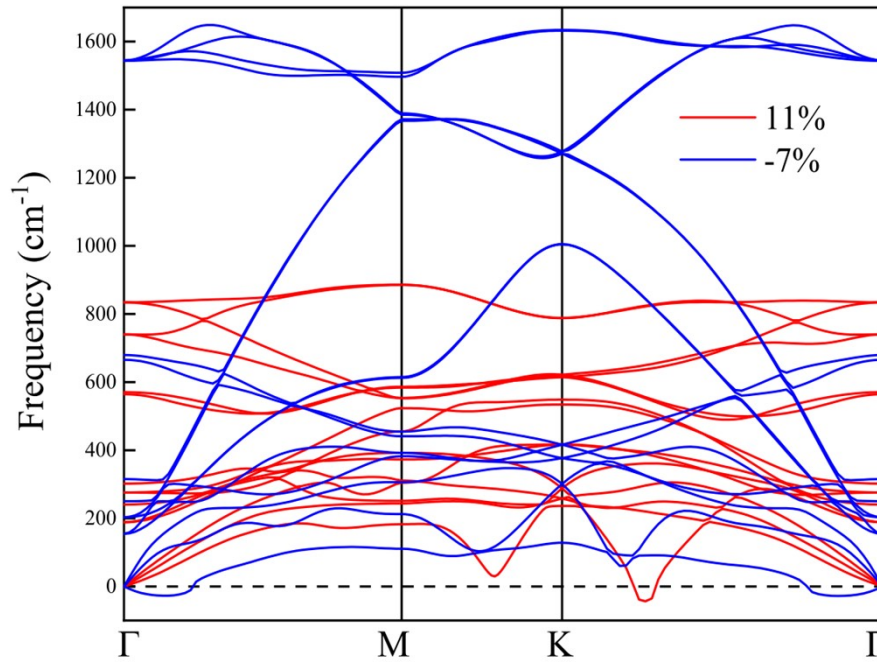

FIG. S4 Phonon dispersion of  $C_2CaC_2$  in the case of biaxial strain with  $\varepsilon = 11\%$  and  $-7\%$ .

#### IV. The $T_c$ of pristine calcium intercalated AA-stacking bilayer graphene $C_2CaC_2$ and biaxial compressive strained $C_2CaC_2$ as a function of Coulomb pseudopotential $\mu^*$ .

It is well known that the Coulomb pseudopotential  $\mu^*$  is an empirical parameter which is closely associated with  $T_c$ . The calculated  $T_c$  of pristine calcium intercalated AA-stacking bilayer graphene  $C_2CaC_2$  and biaxial tensile strained  $C_2CaC_2$  as a function of  $\mu^*$  is shown in Fig. S5. The value of  $\mu^*$  is considered in the range of 0.05–0.20. As is seen in Fig. S5, the  $T_c$  decreases monotonically with the increasing of  $\mu^*$  for both pristine  $C_2CaC_2$  and biaxial tensile strained  $C_2CaC_2$ . As  $\mu^*$  increases from 0.05 to 0.20,  $T_c$  decreases from 26.3 K, 28.6 K, 32.2 K to 7.1 K, 10.3 K, 16.1 K for the pristine, -2% and -4% compressive strained cases, respectively. For the commonly used  $\mu^* = 0.10$ , the  $T_c$  for the pristine, -2% and -4% compressive strained cases are 18.9 K, 21.9 K and 26.6 K, respectively, which are listed in Table 1 of the main text.

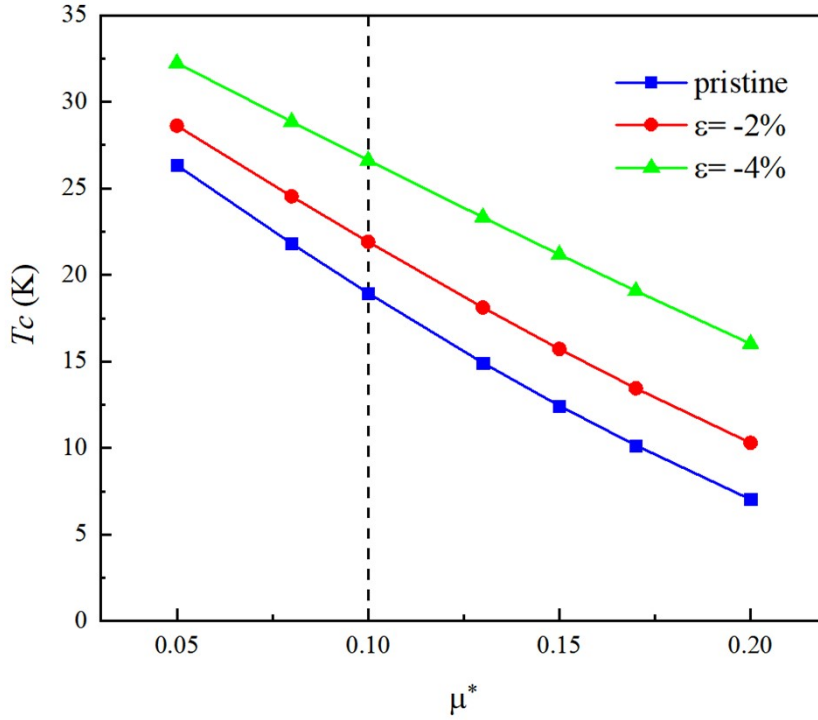

FIG. S5: The calculated  $T_c$  of pristine calcium intercalated AA-stacking bilayer graphene  $C_2CaC_2$  and biaxial tensile strained  $C_2CaC_2$  as a function of Coulomb pseudopotential  $\mu^*$ . The vertical line marks the value of  $\mu^* = 0.10$  used in the main text.

## V. The $\lambda$ and $T_c$ as a function of degauss for different $k$ meshes and $q$ meshes for pristine $C_2CaC_2$ .

The convergence of  $T_c$  is consistent with the convergence of the EPC  $\lambda$ , which should satisfy two requirements: (1)  $\lambda/T_c$  should converge with respect to the  $k$  mesh and  $q$  mesh, that is, for a dense enough  $k$  mesh and  $q$  mesh, the  $\lambda$  vs degauss curve should become overlap. (2)  $\lambda/T_c$  should also converge with degauss (the smearing width in the EPC calculation). We should find the degauss at which  $\lambda/T_c$  becomes relatively flat, and the results at this degauss should be chosen as the convergence data. To test the convergence of the  $\lambda$  and  $T_c$  of pristine  $C_2CaC_2$ , we plot the curves for  $\lambda$  and  $T_c$  under a series of degauss with  $k$  meshes of  $24 \times 24 \times 1$ ,  $32 \times 32 \times 1$ , and  $48 \times 48 \times 1$  and corresponding  $q$  meshes of  $4 \times 4 \times 1$ ,  $8 \times 8 \times 1$ , and  $12 \times 12 \times 1$ , which are shown by the black, red, and blue lines with squares, dots, and triangles in Fig. S6. From Figs. S6(a) and S6(b), we can find the following results: (1) Using different  $k$  meshes and  $q$  meshes, the corresponding  $\lambda$  basically converges at  $k$  mesh of  $48 \times 48 \times 1$  and the corresponding  $q$  mesh of  $12 \times 12 \times 1$ . (2) The  $T_c$  also converges at this  $k$  mesh and  $q$  mesh, and the  $T_c$  vs degauss curve becomes relatively flat at degauss of 0.015 Ry, with a corresponding  $T_c$  of 18.9 K. Thus, the  $k$  mesh and  $q$  mesh used in this work is converged for the calculation of  $T_c$ .

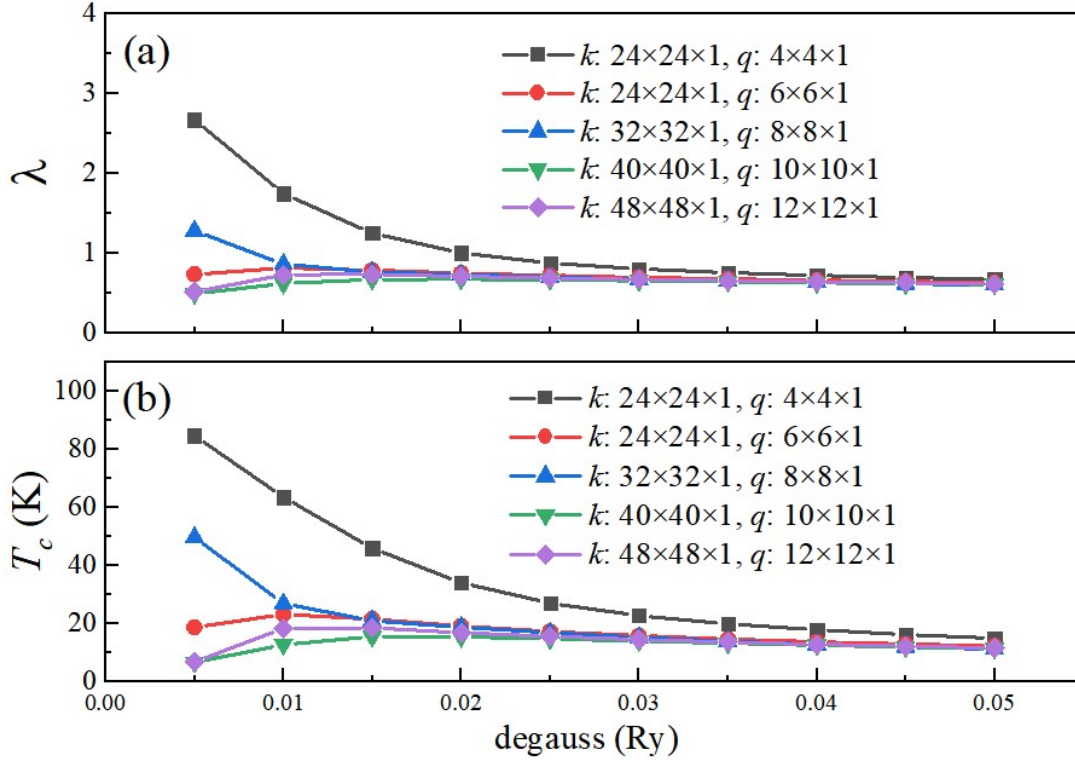

Fig. S6:  $\lambda$ (a) and  $T_c$  (b) as a function of degauss for different  $k$  meshes and  $q$  meshes for pristine  $C_2CaC_2$ .

## VI. The phonon spectrum corresponding to different smearing parameter for pristine $C_2CaC_2$ .

Using Methfessel-Paxton smearing method for the electronic charge density calculations, it is important to select critical smearing parameter as it significantly impacts the imaginary phonon modes. In addition to the 0.02 parameter used in the paper, we also calculated the phonon dispersion for parameters 0.01 and 0.03 and found no imaginary frequency. Figs. S7(a) and S7(b) represent phonon spectra with parameters 0.01 and 0.03, respectively.

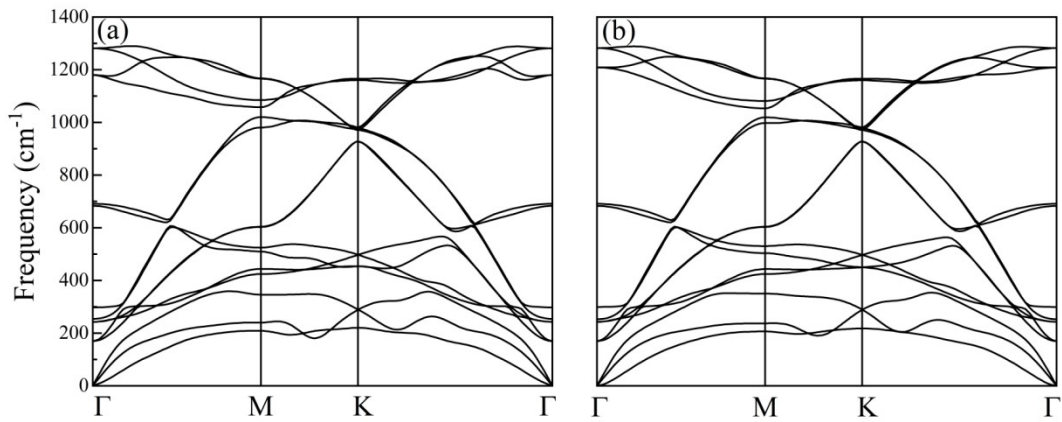

Fig. S7: The phonon dispersion with smearing parameters 0.01 (a) and 0.03 (b) of pristine  $C_2CaC_2$ .



## VII. Electron localization function (ELF) of pristine $C_2CaC_2$ .

The ELF value ranges from 0 to 1. Generally, 0 indicates very low electron density, 0.5 indicates homogeneity of electron gas, and 1 indicates strong covalent bonding or lone pair electrons. The 2D maps of ELF for  $C_2CaC_2$  are shown in Fig. S8. The ELF value between C and Ca is almost zero, indicating a very low electron density as shown in Fig. S8(a). That suggested ionic bond between C and Ca atoms. Fig. S8(b) suggested covalent bonds between C atoms.

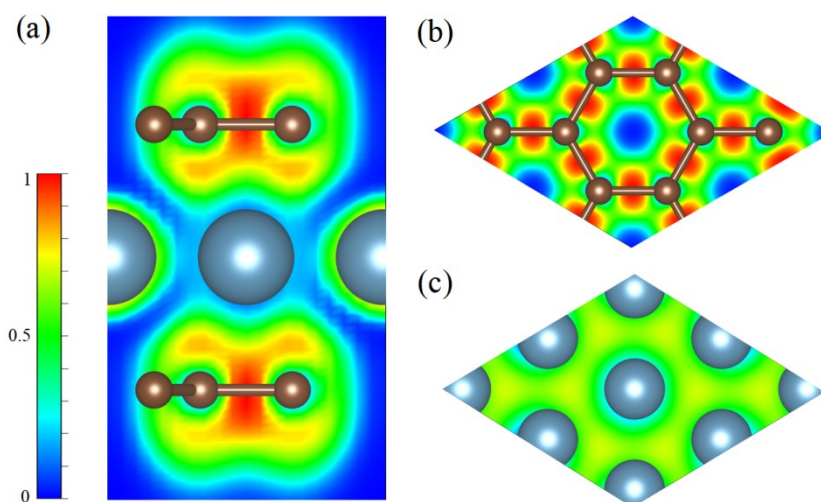

Fig. S8: 2D maps of ELF for  $C_2CaC_2$ .

## References

- [1] W. L. McMillan, *Phys. Rev.*, 1968, **167**, 331.
- [2] R.C. Dynes, *Solid State Commun.*, 1972, **10**, 615.
- [3] P.B. Allen and R.C. Dynes, *Phys. Rev. B*, 1975, **12**, 905.
